# Supplementary material for: Determinants of Infant Adiposity across the First 6 Months of Life: Evidence from the Baby-bod study
Source: J Clin Med. 2021 Apr 19;10(8):1770. doi: 10.3390/jcm10081770 (PMC8073882; doi:10.3390/jcm10081770)
Supplement: Supplementary file 1 [file jcm-10-01770-s001.zip › jcm-1162896-supplementary.pdf]

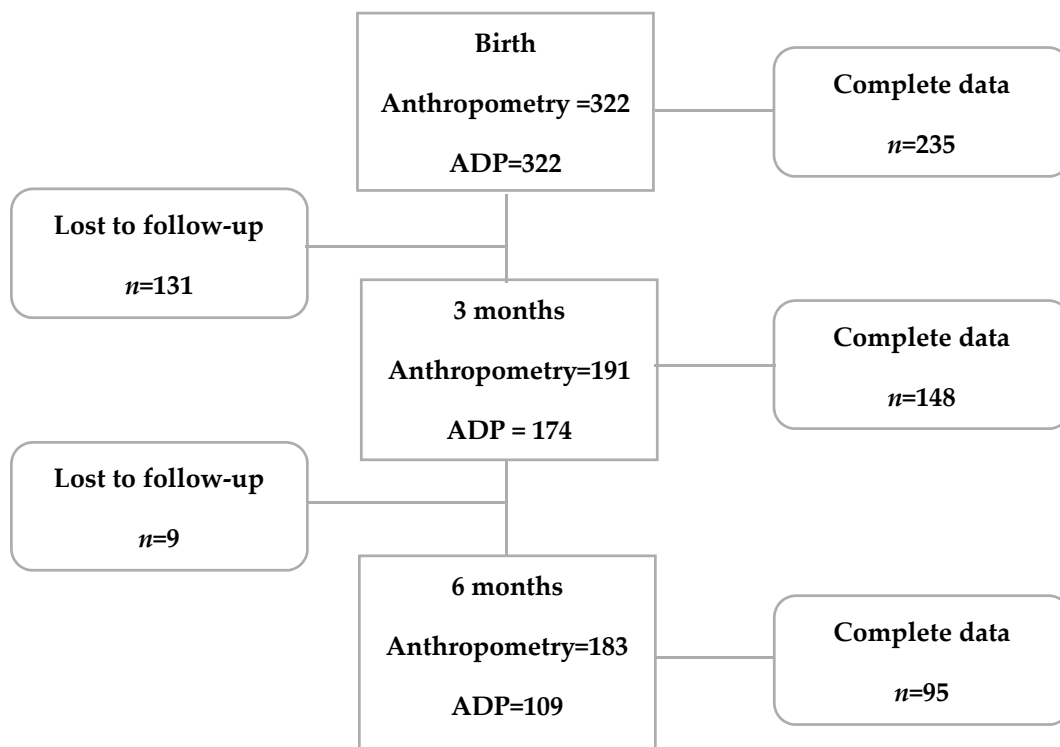

**Figure S1. The flow of the participants of the Baby-bod study.**

ADP: Air Displacement Plethysmography. Anthropometric measurements include weight, length, head circumference of infants. Complete data indicates the number of infants included in the analysis after removing the infants with missing data for maternal variables considered.

Table S1: Characteristics of the full-cohort and analytical cohort

| Characteristic                                               | Full cohort | Analytical cohort    |                      |                      |                      | <i>p</i> -value |
|--------------------------------------------------------------|-------------|----------------------|----------------------|----------------------|----------------------|-----------------|
|                                                              | Birth       | Birth                | 3 months             | 6 months             |                      |                 |
|                                                              | N = 322     | N = 235              | N = 148              | N = 95               |                      |                 |
| Infant sex <sup>1</sup>                                      |             |                      |                      |                      |                      | >0.9            |
|                                                              | Female      | 167 (51.9%)          | 127 (54.0%)          | 79 (53.4%)           | 52 (54.7%)           |                 |
|                                                              | Male        | 155 (48.1%)          | 108 (46.0%)          | 69 (46.6%)           | 43 (45.3%)           |                 |
| Gestation length (weeks) <sup>2</sup>                        |             | 39.50 (1.14)         | 39.53 (1.15)         | 39.61 (1.14)         | 39.75 (1.16)         | 0.3             |
| Maternal ethnicity <sup>1</sup>                              |             |                      |                      |                      |                      | 0.8             |
|                                                              | Caucasian   | 294 (91.6%)          | 217 (92.3%)          | 139 (93.9%)          | 89 (93.7%)           |                 |
|                                                              | Other       | 27 (8.4%)            | 18 (7.7%)            | 9 (6.1%)             | 6 (6.3%)             |                 |
|                                                              | Unknown     | 1                    |                      |                      |                      |                 |
| Maternal age <sup>2</sup>                                    |             | 29.87 (5.21)         | 29.84 (5.26)         | 30.42 (5.00)         | 30.63 (4.56)         | 0.3             |
| Parity <sup>1</sup>                                          |             |                      |                      |                      |                      | 0.9             |
|                                                              | Primiparous | 143 (44.4%)          | 107 (45.5%)          | 71 (48.0%)           | 44 (46.3%)           |                 |
|                                                              | Multiparous | 179 (55.6%)          | 128 (54.5%)          | 77 (52.0%)           | 51 (53.7%)           |                 |
| Maternal prenatal BMI (kg/m <sup>2</sup> ) <sup>3</sup>      |             | 25.20 (22.00, 29.70) | 25.10 (22.30, 29.80) | 25.30 (22.40, 28.85) | 25.30 (22.15, 28.40) | 0.7             |
|                                                              | Unknown     | 25                   |                      |                      |                      |                 |
| Supplemental iron intake during pregnancy <sup>1</sup>       |             |                      |                      |                      |                      |                 |
|                                                              | Yes         | 232 (79.5%)          | 180 (76.6%)          | 112 (75.7%)          | 73 (76.8%)           | >0.9            |
|                                                              | No          | 60 (20.5%)           | 55 (23.4%)           | 36 (24.3%)           | 22 (23.2%)           |                 |
|                                                              | Unknown     | 30                   |                      |                      |                      |                 |
| Supplemental folic acid intake during pregnancy <sup>1</sup> |             |                      |                      |                      |                      |                 |
|                                                              | Yes         | 177 (64.1%)          | 141 (60.0%)          | 93 (62.8%)           | 60 (63.2%)           | 0.8             |
|                                                              | No          | 99 (30.7%)           | 94 (40.0%)           | 55 (37.2%)           | 35 (36.8%)           |                 |
|                                                              | Unknown     | 46                   |                      |                      |                      |                 |

<sup>1</sup> n (%); <sup>2</sup>Mean (SD); <sup>3</sup>Median (IQR); significance tests: Pearson's Chi-squared test for categorical variables; Kruskal-Wallis rank-sum test for continuous variables; BMI: body mass index
